# Supplementary material
Source: MDPI journal article supplement (https://www.mdpi.com/1424-8247/16/1/97)
Supplement: s1 [file s1]

# Design, Synthesis and Biological Evaluation of 2-Mercaptobenzoxazole Derivatives as Potential Multi-kinase Inhibitors

Mohammed M. Alanazi<sup>1\*</sup>, Saleh Aldawas<sup>1</sup>, Nawaf A. Alsaif<sup>1</sup>

<sup>1</sup> Department of Pharmaceutical Chemistry, College of Pharmacy, King Saud University, Riyadh 11541, Saudi Arabia

\* Correspondence: mmalanazi@ksu.edu

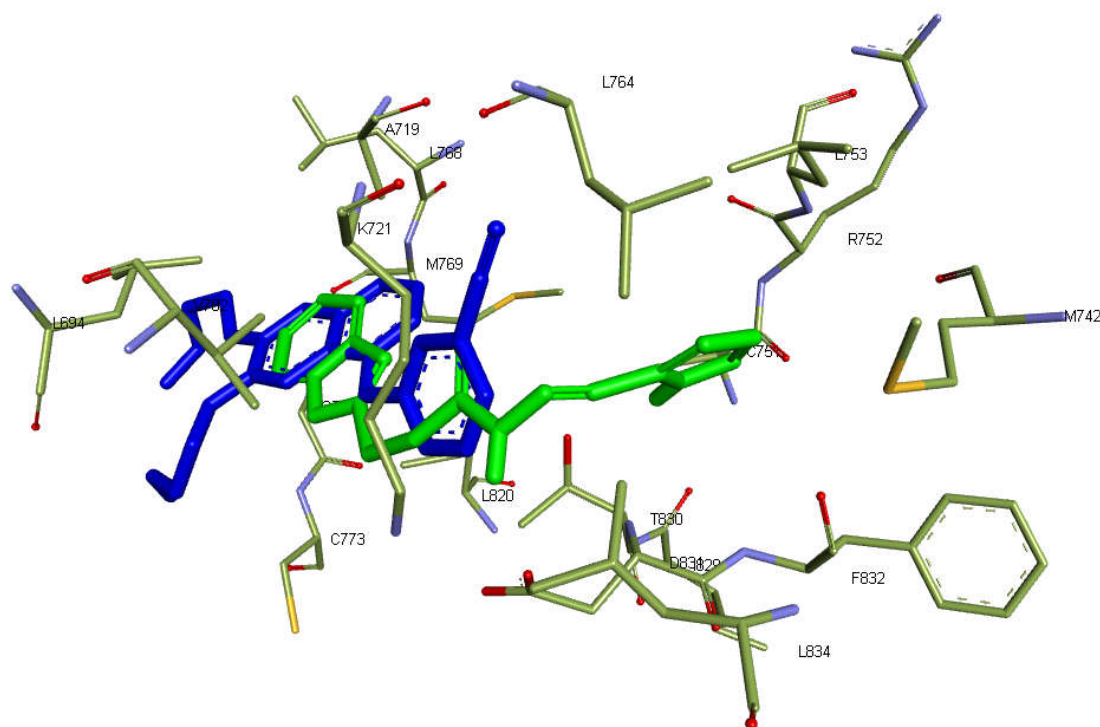

Figure S1: superimposition of erlotinib (blue) and compound 6b (green) in the active site EGFR.

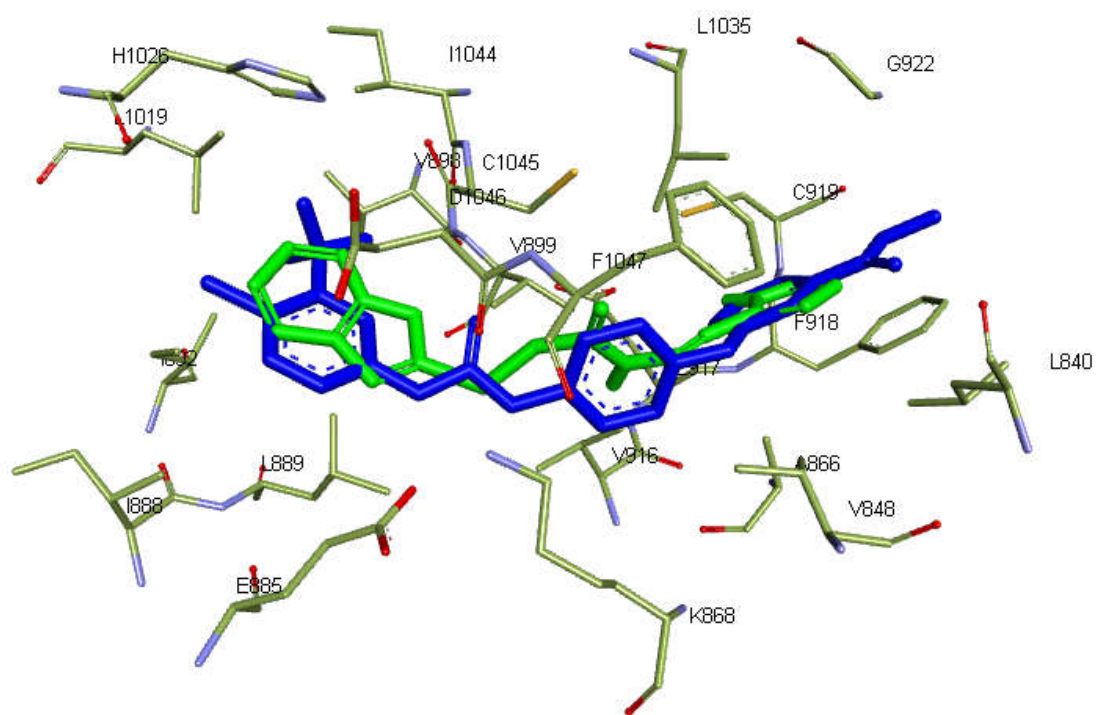

Figure S2: superimposition of sorafenib (blue) and compound 6b (green) in the active site VEGFR2.

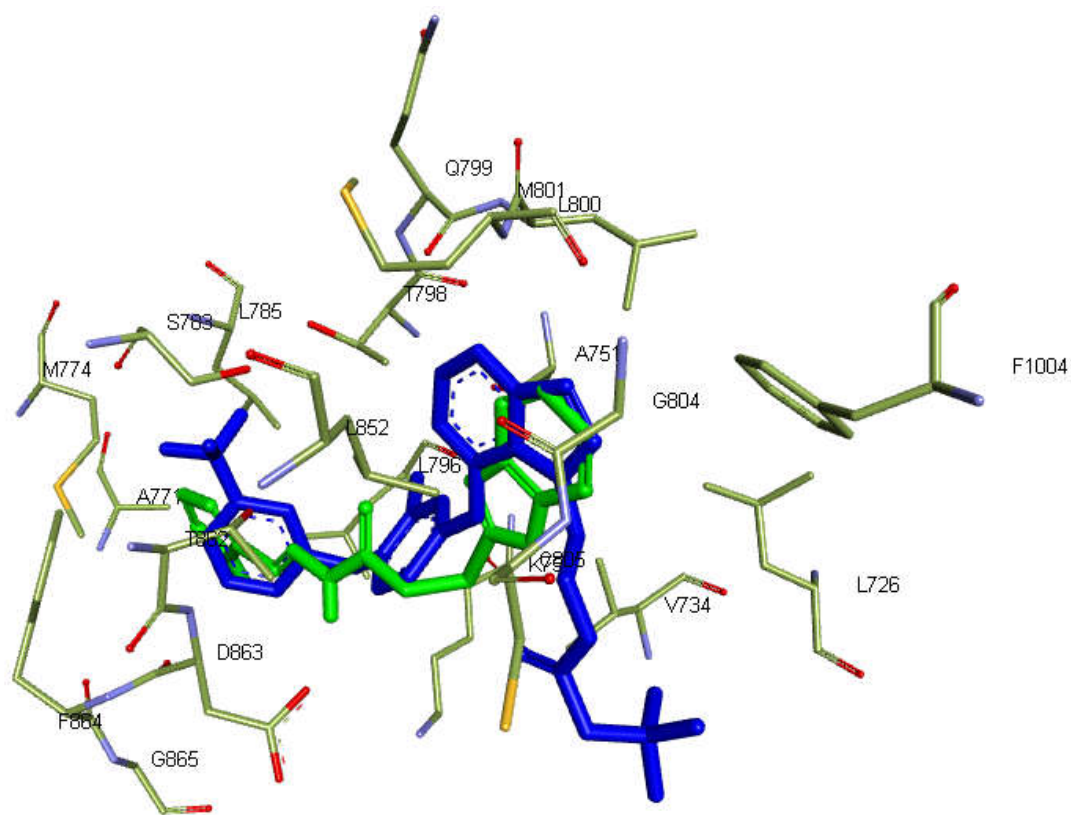

Figure S3: superimposition of lapatinib (blue) and compound 6b (green) in the active site HER2.

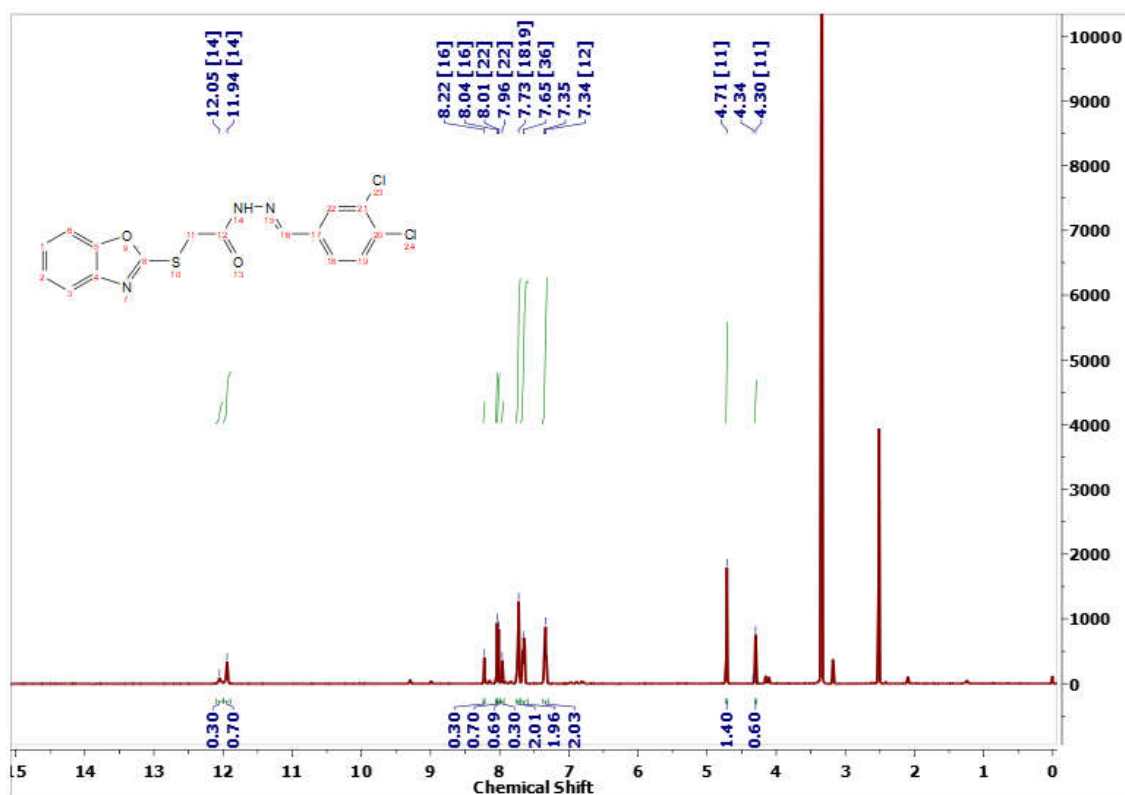

Figure S4:  $^1\text{H}$ NMR of compound 4a

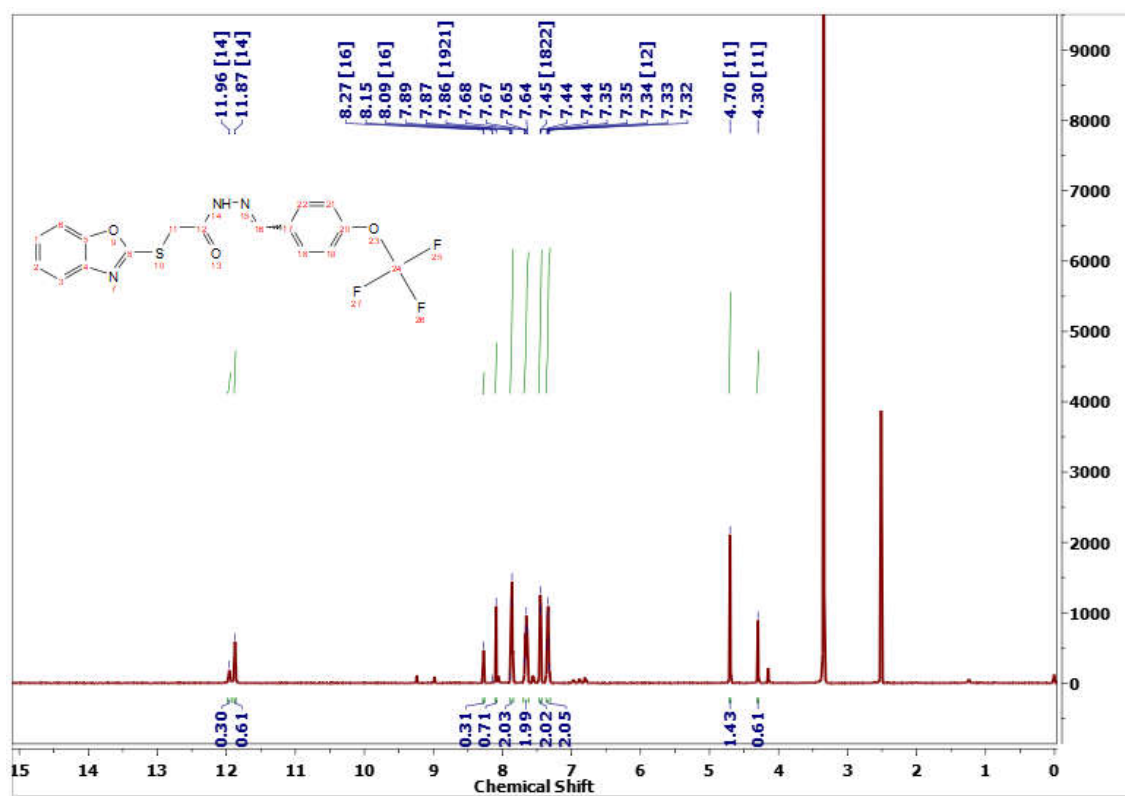

Figure S5:  $^1\text{H}$ NMR of compound 4b

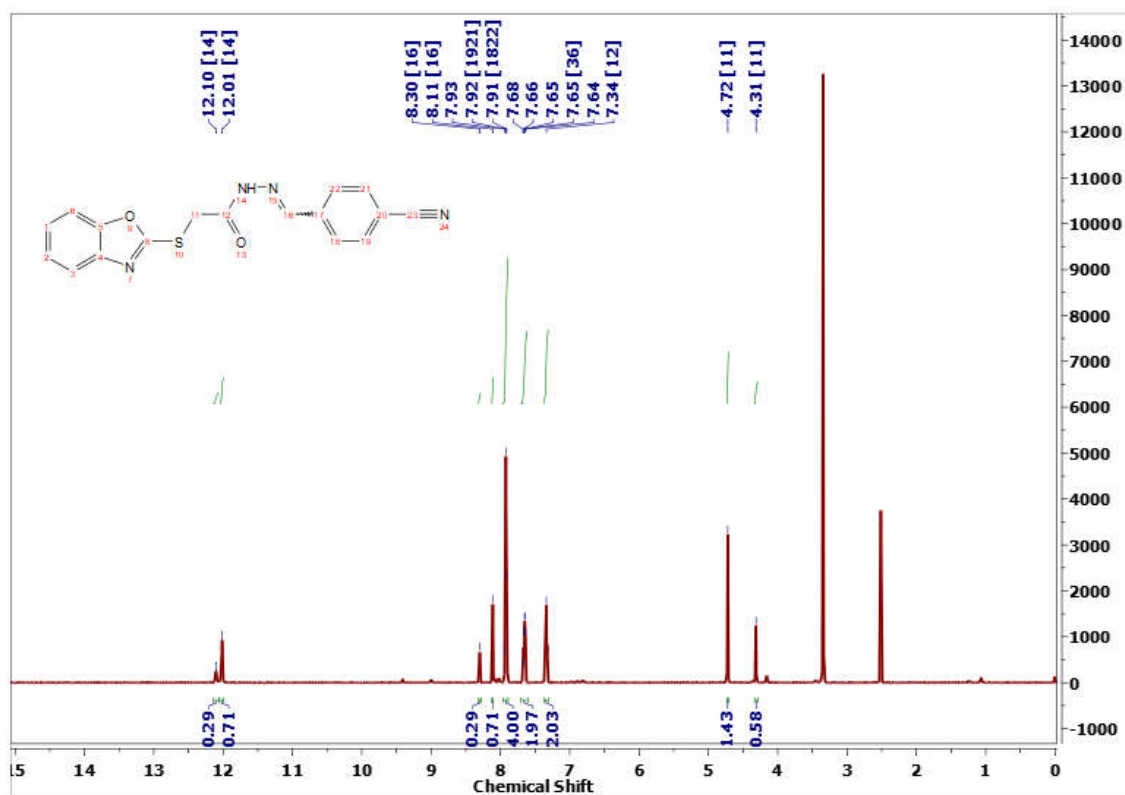

Figure S 6: <sup>1</sup>H NMR of compound 4c

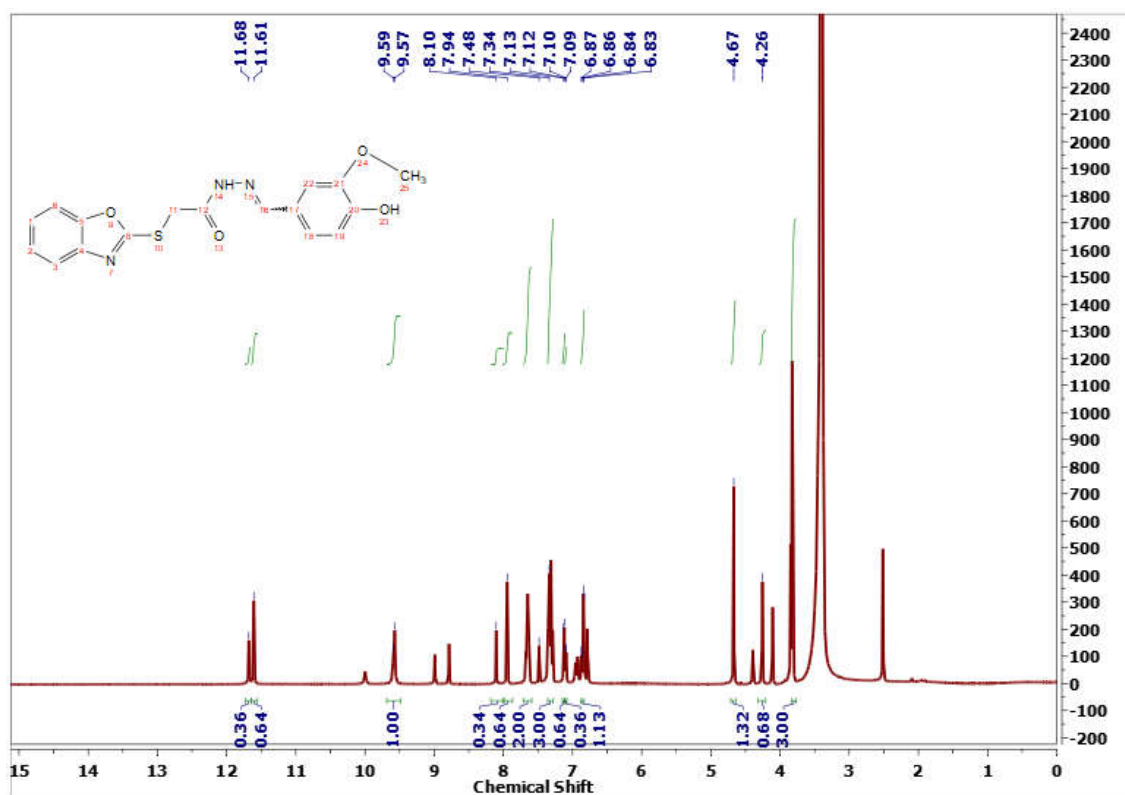

Figure S7: <sup>1</sup>H NMR of compound 4d

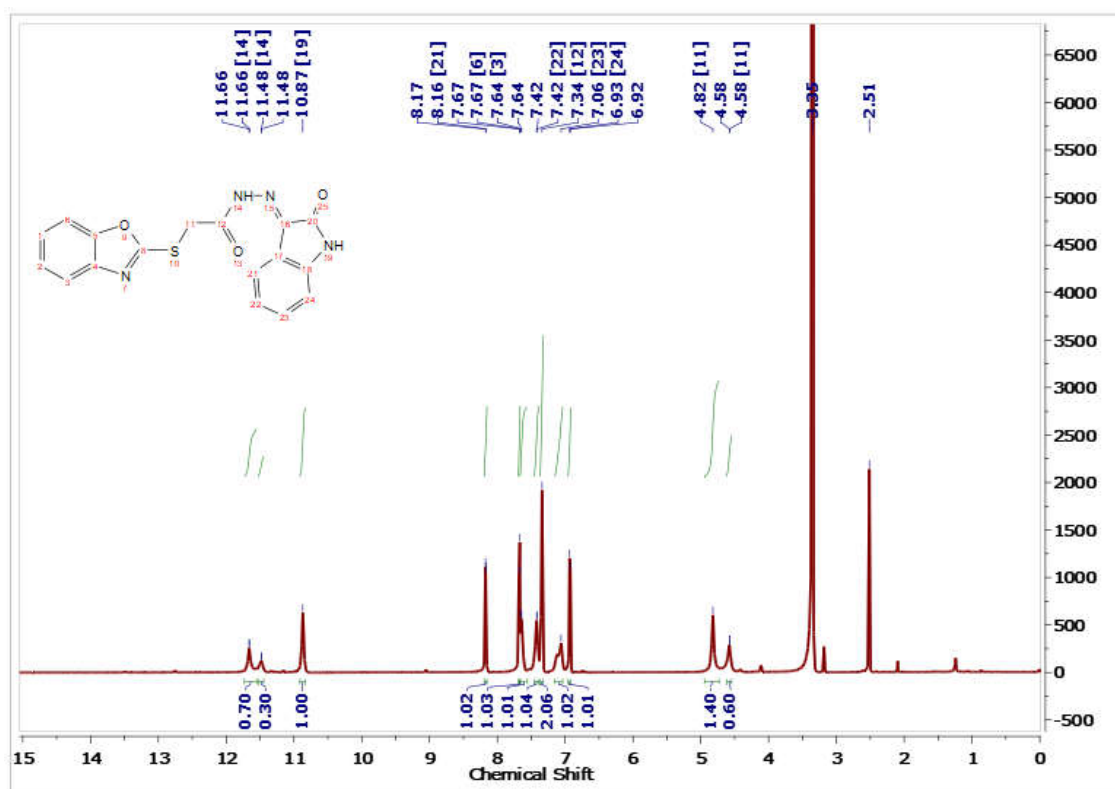

Figure S8:  $^1\text{H}$ NMR of compound 5a

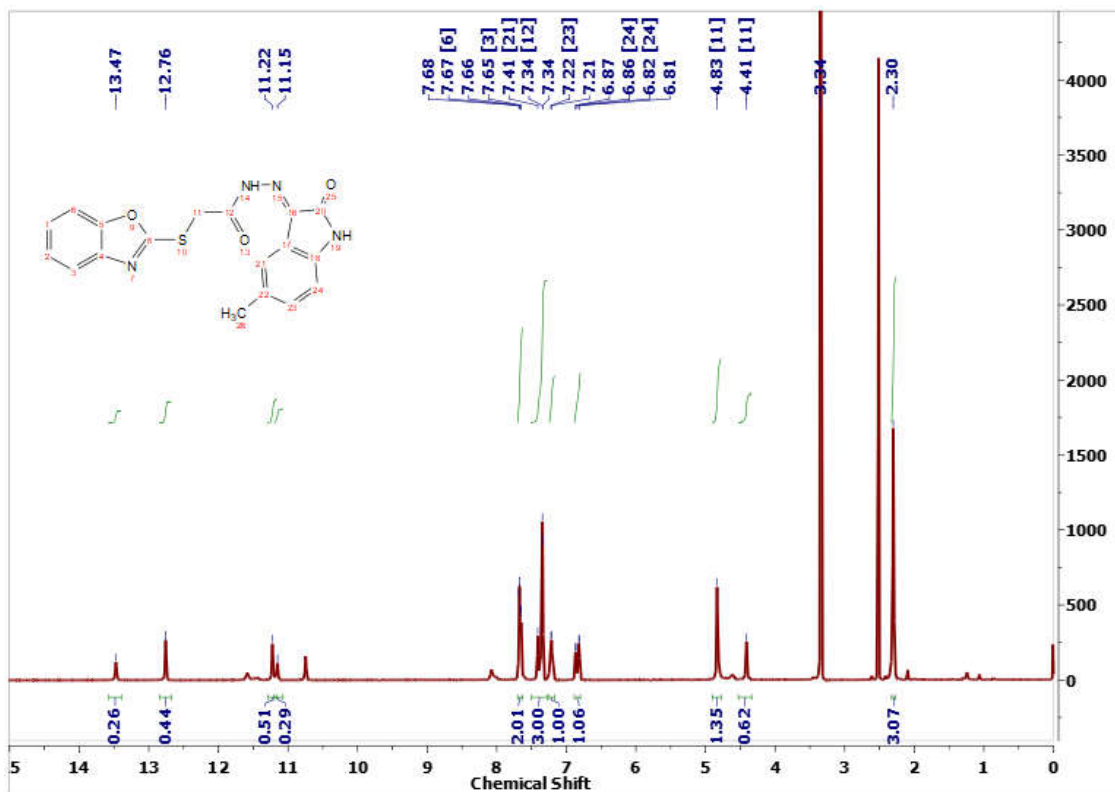

Figure S9:  $^1\text{H}$ NMR of compound 5b

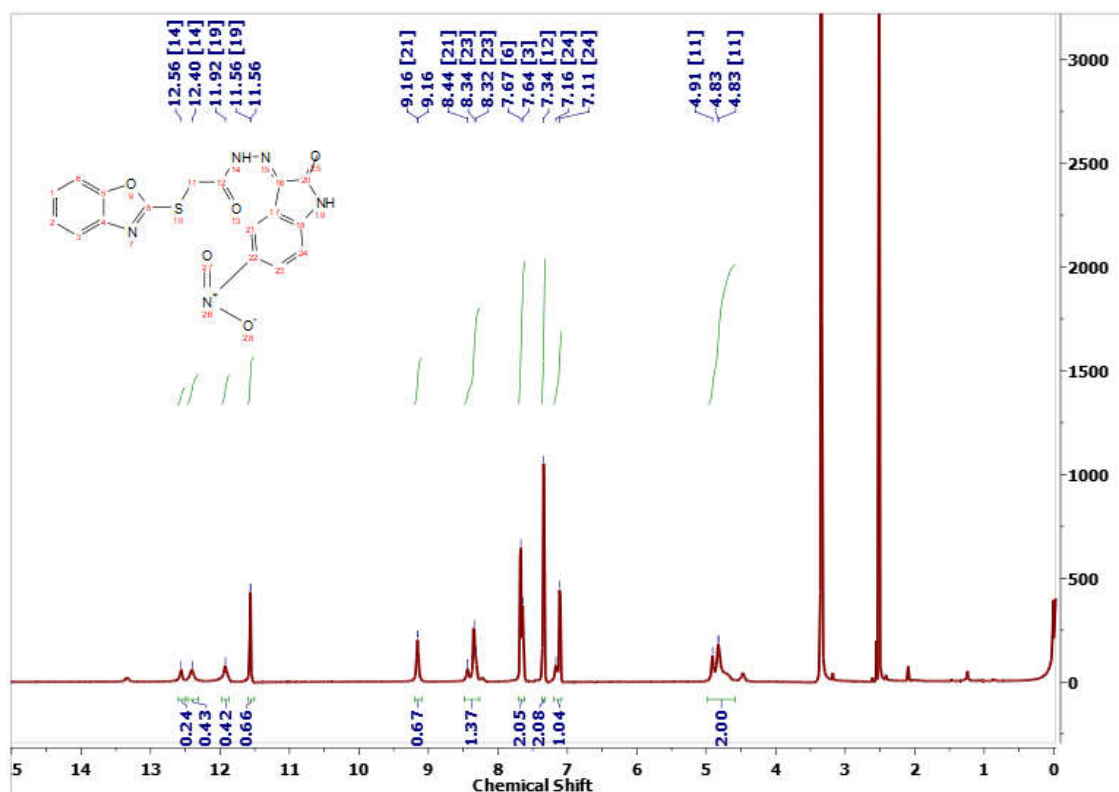

Figure S10: <sup>1</sup>H NMR of compound 5c

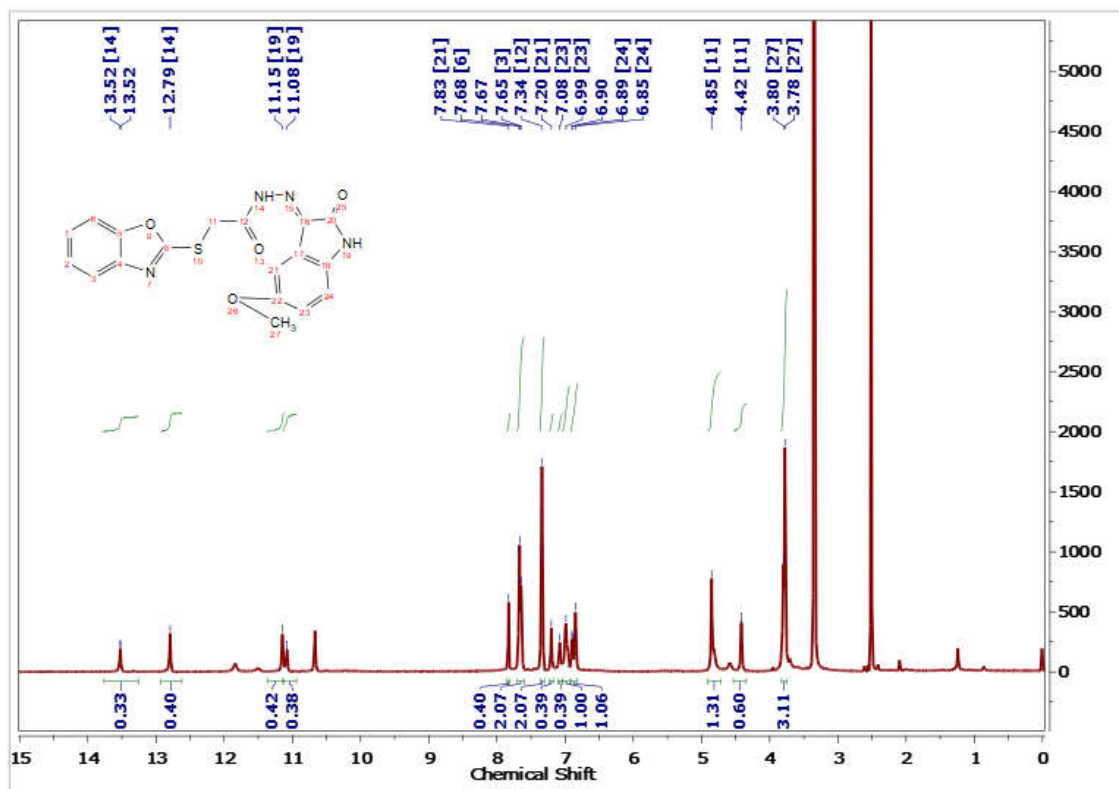

Figure S11: <sup>1</sup>H NMR of compound 5d



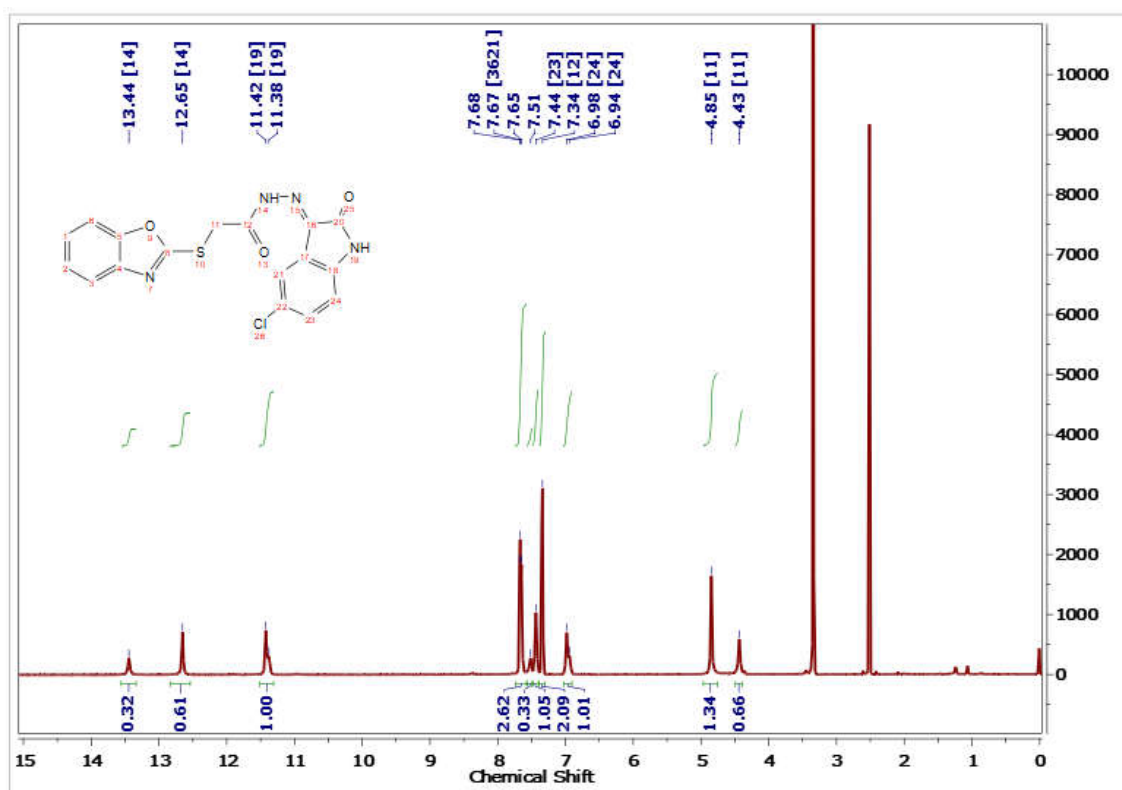

Figure S12: <sup>1</sup>H NMR of compound 5e

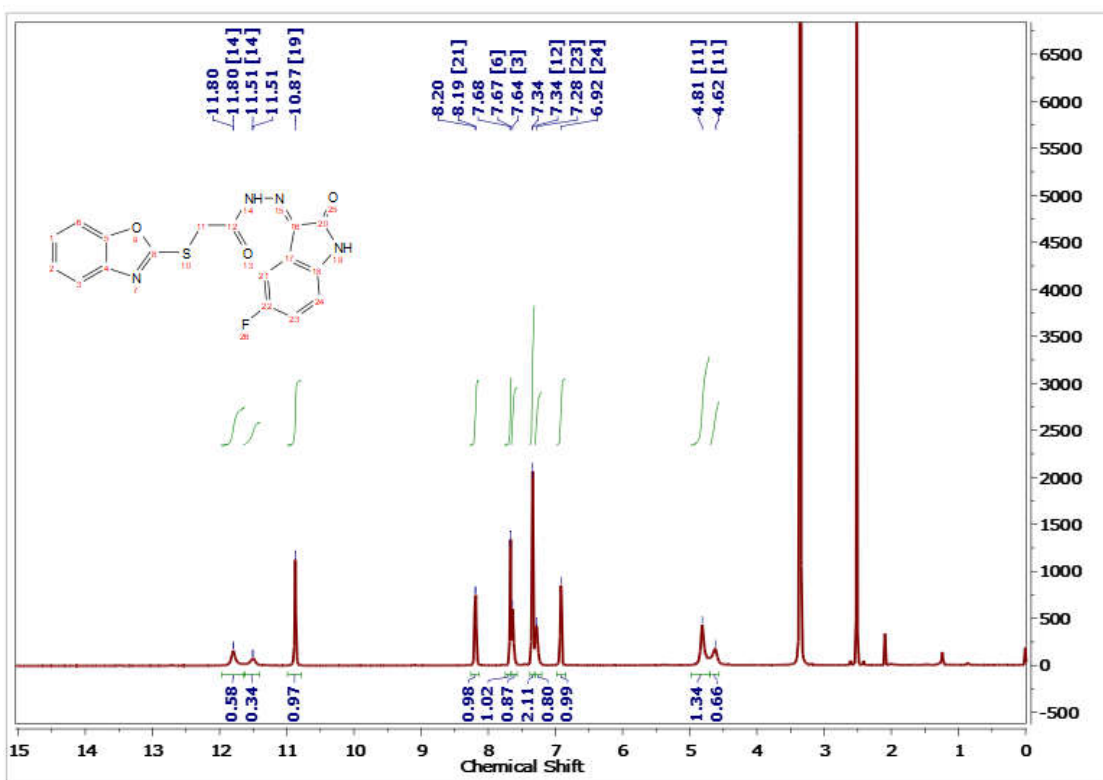

Figure S13: <sup>1</sup>H NMR of compound 5f

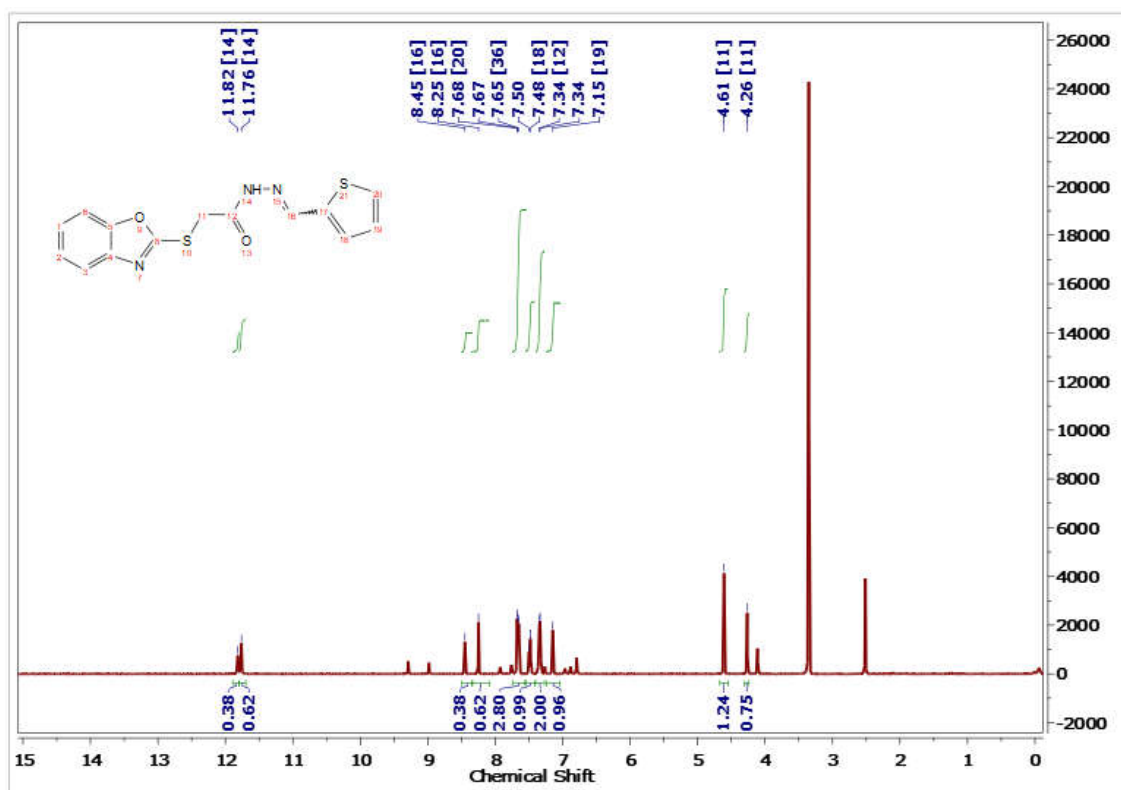

Figure S14: <sup>1</sup>H NMR of compound 6a

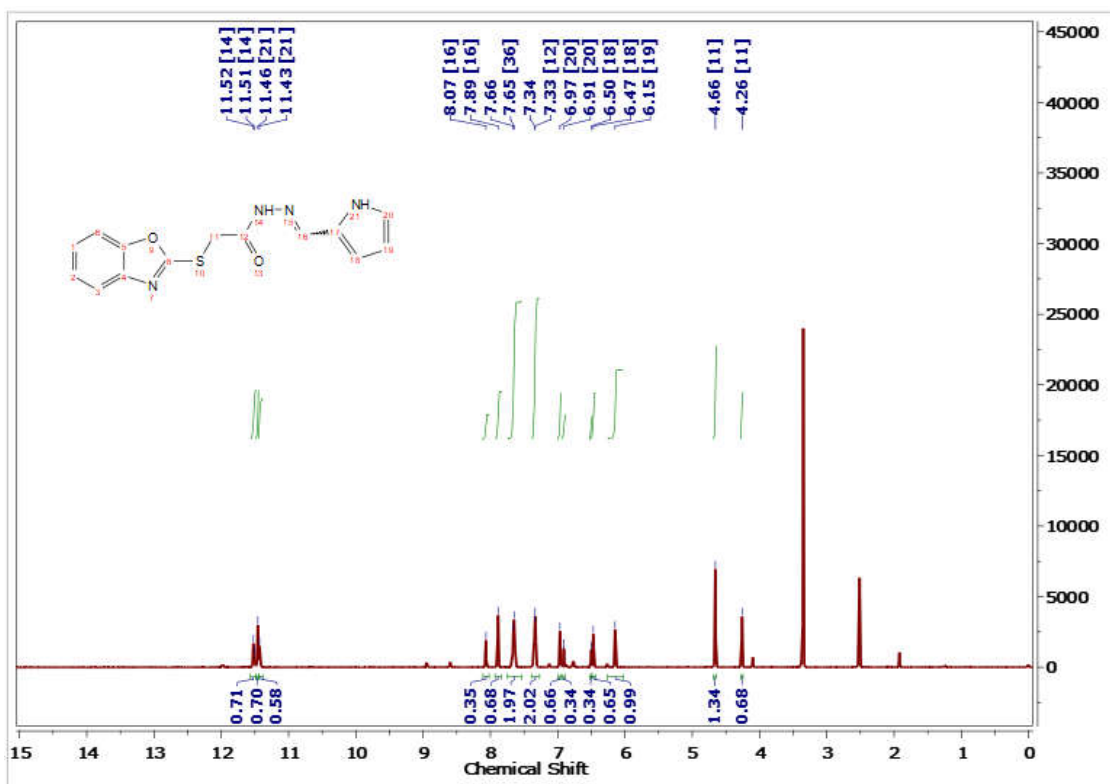

Figure S15: <sup>1</sup>H NMR of compound 6



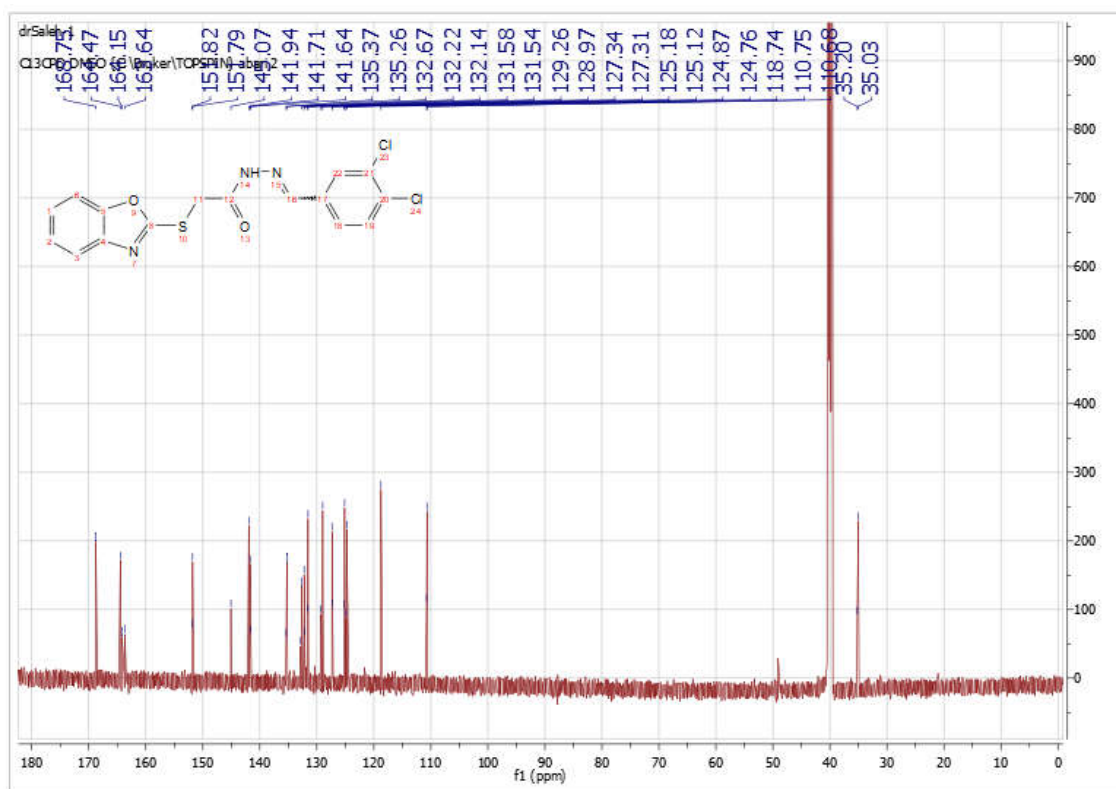

Figure S16:  $^{13}\text{C}$ NMR of compound 4a

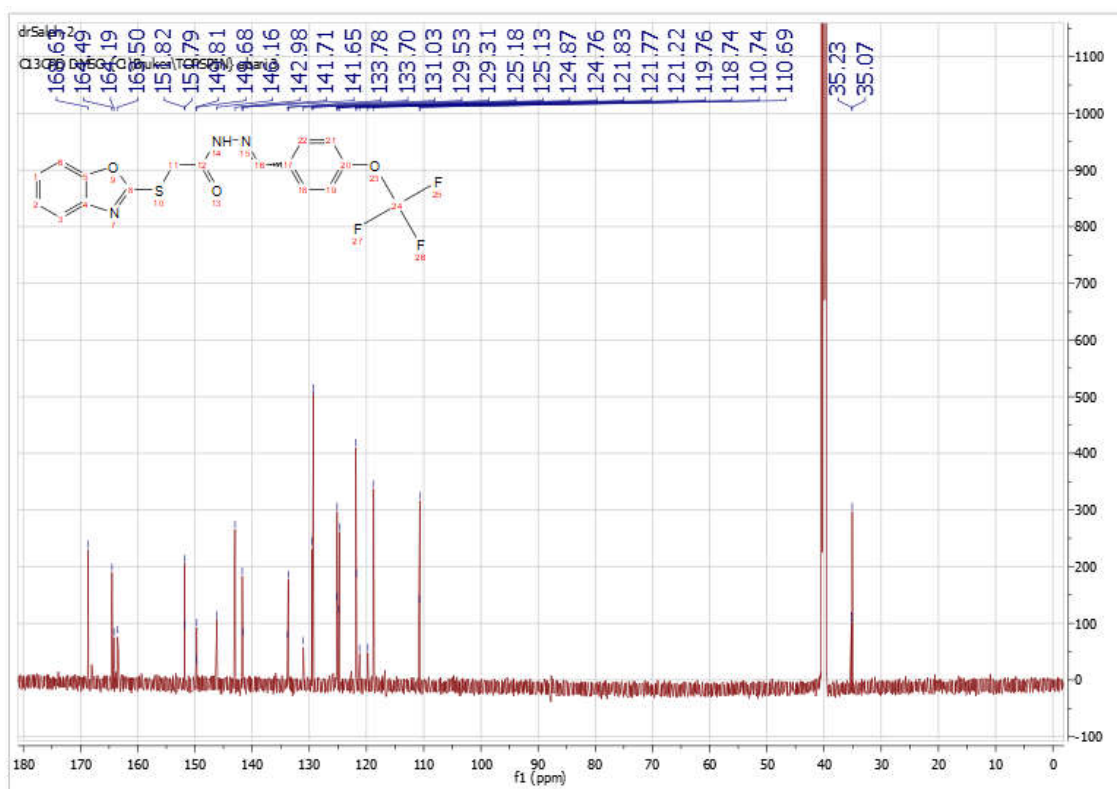

Figure S17: <sup>13</sup>CNMR of compound 4b

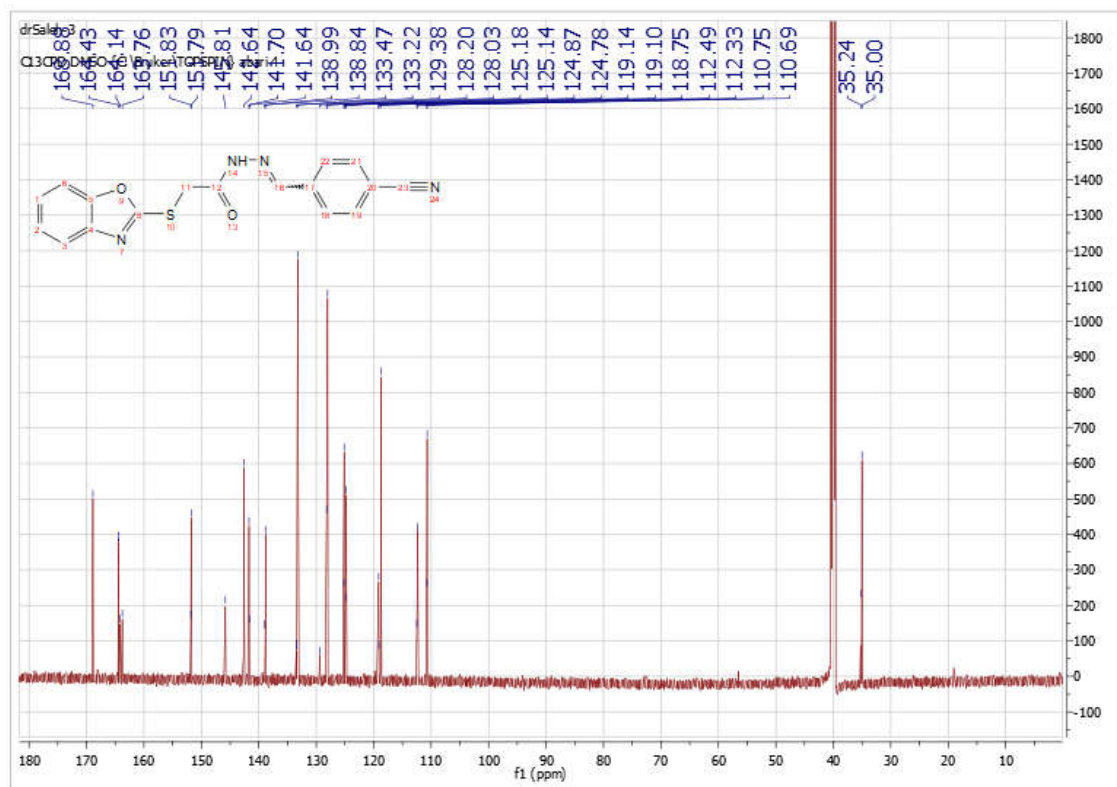

Figure S18: <sup>13</sup>CNMR of compound 4c

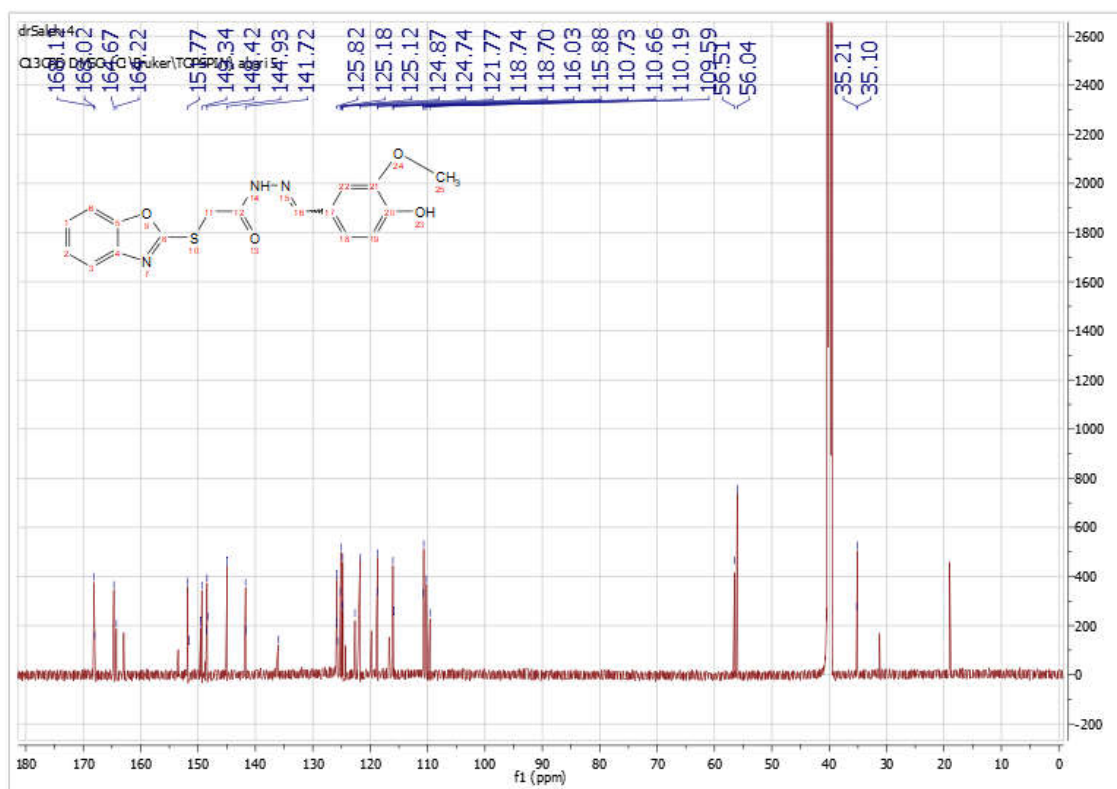

Figure S19: <sup>13</sup>CNMR of compound 4d

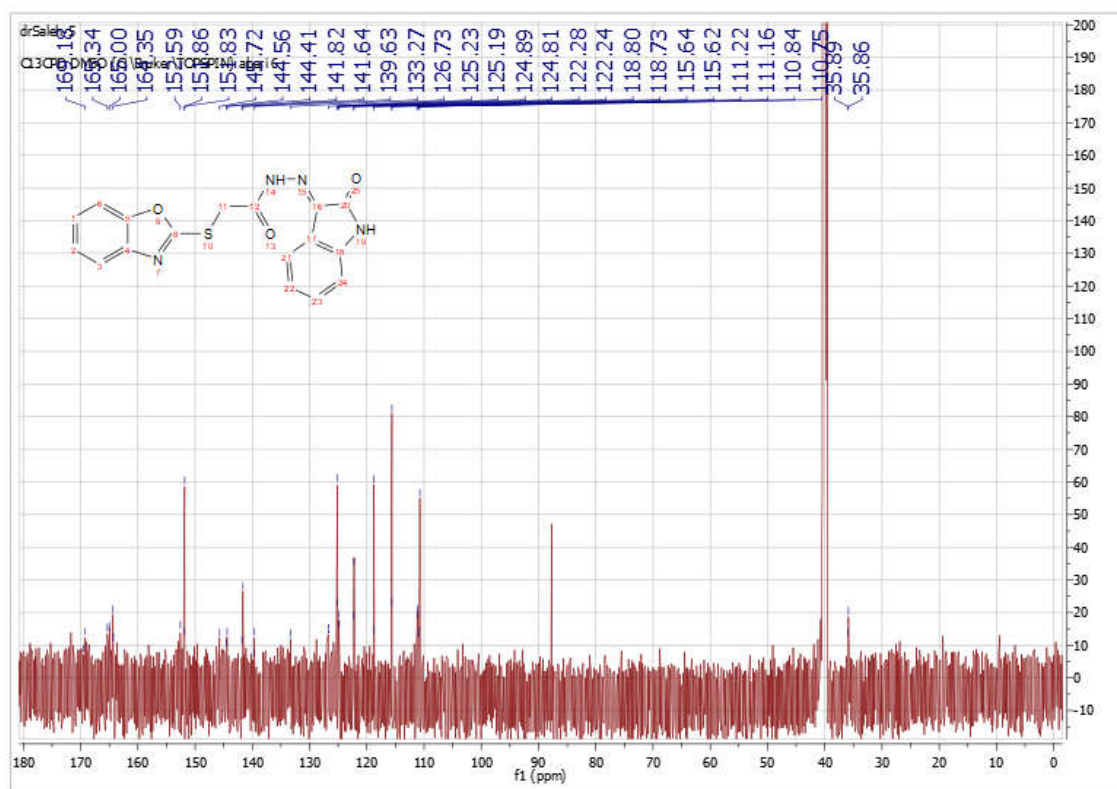

Figure S20: <sup>13</sup>CNMR of compound 5a

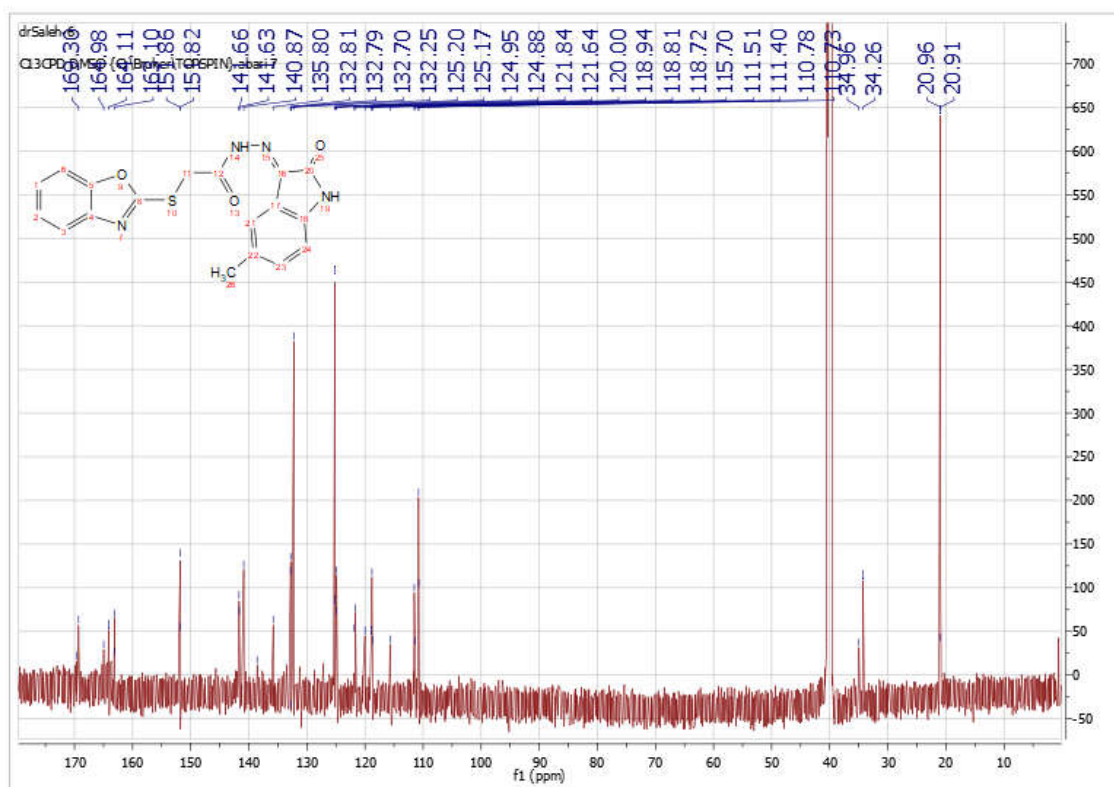

Figure S21: <sup>13</sup>CNMR of compound 5b

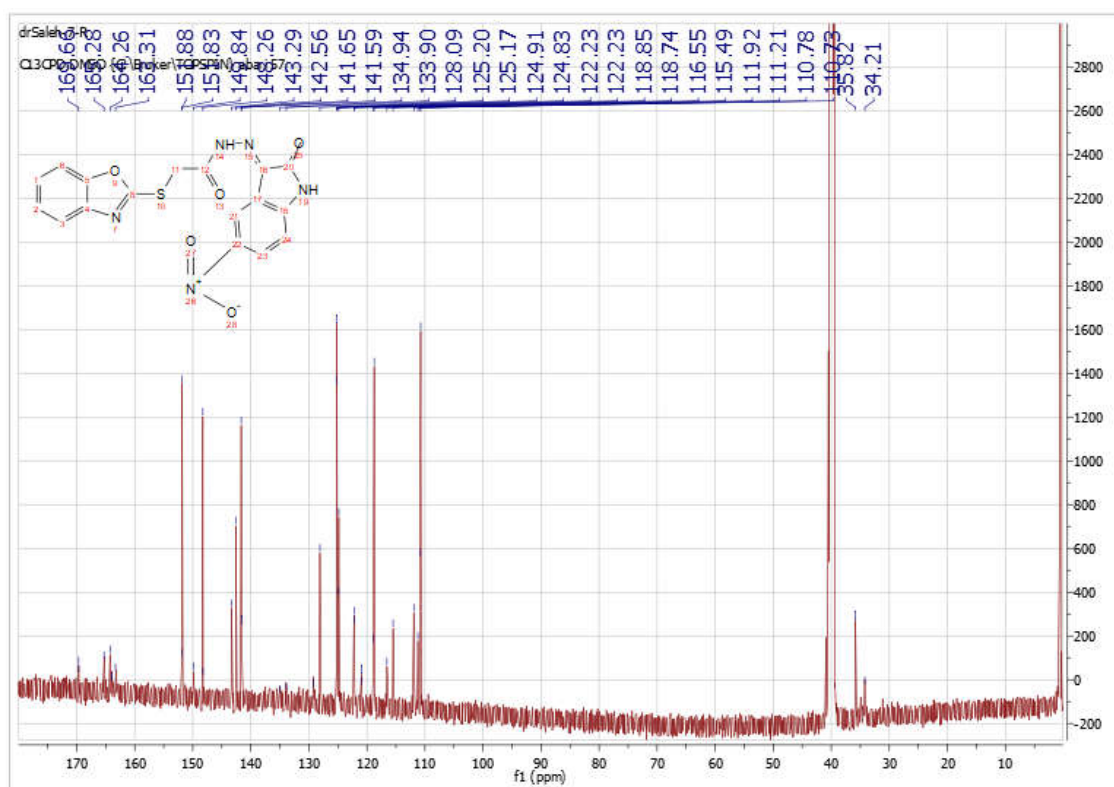

Figure S22: <sup>13</sup>CNMR of compound 5c

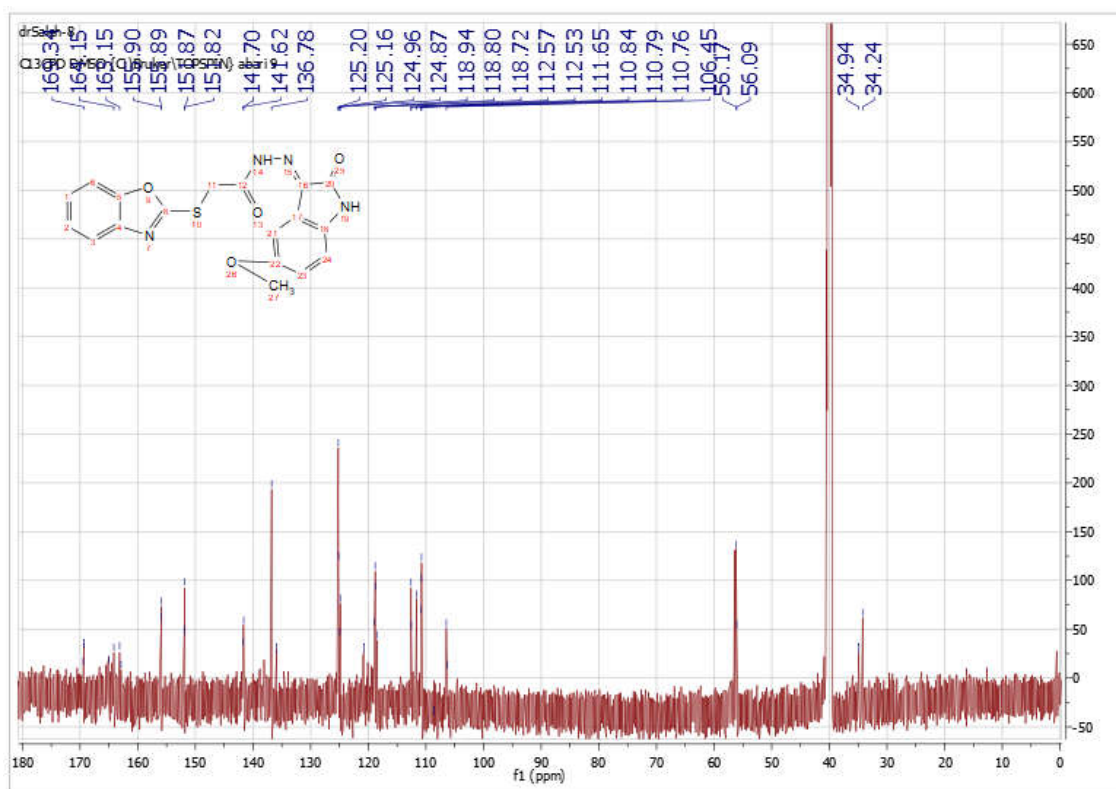

Figure S23:  $^{13}\text{C}$ NMR of compound 5d

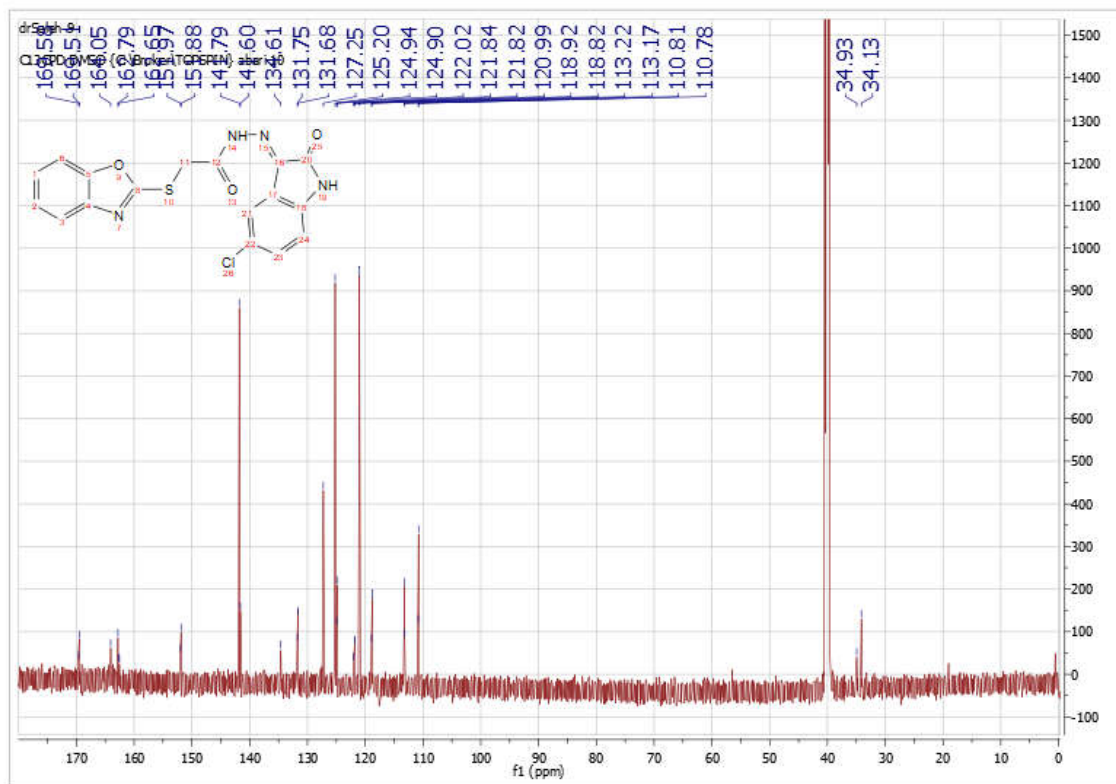

Figure S24:  $^{13}\text{C}$ NMR of compound 5e



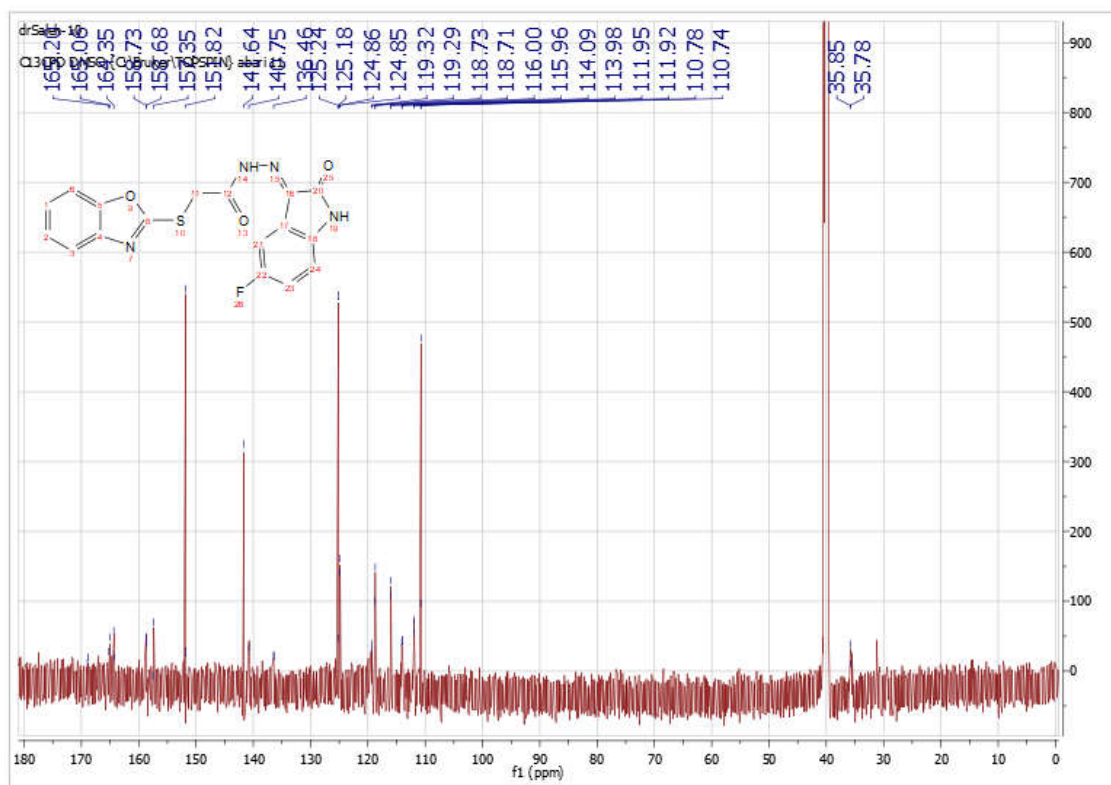

Figure S25:  $^{13}\text{C}$ NMR of compound 5f

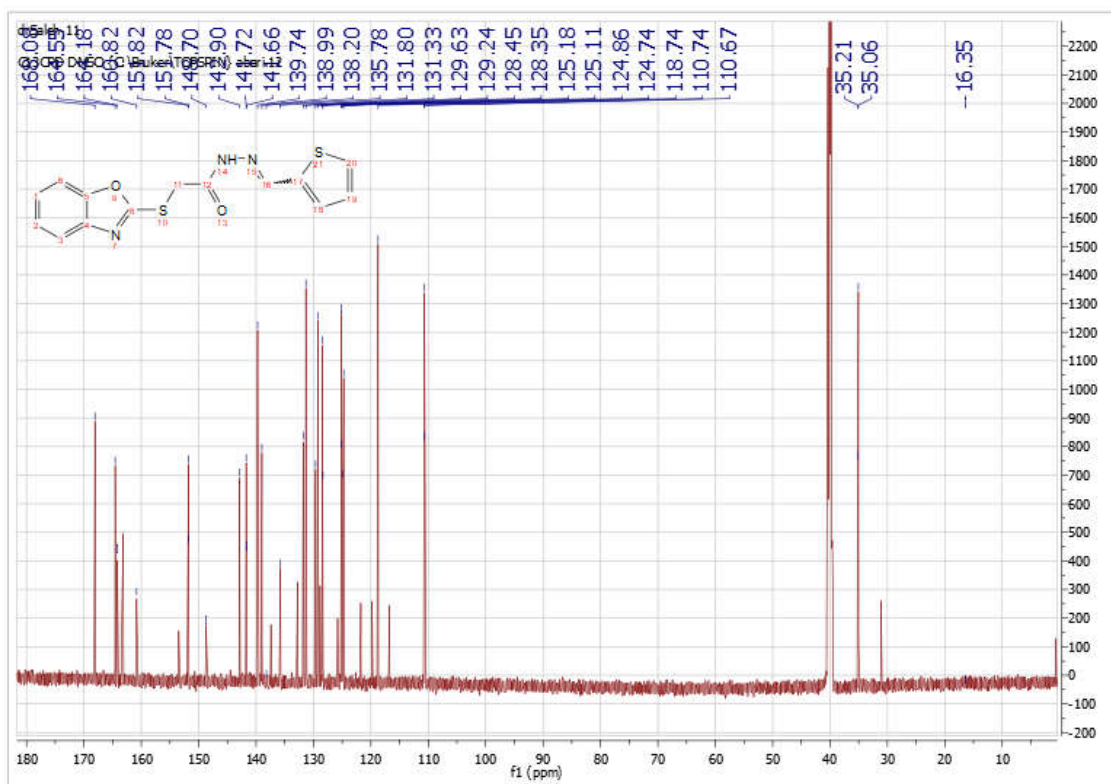

Figure S26:  $^{13}\text{C}$ NMR of compound 6a



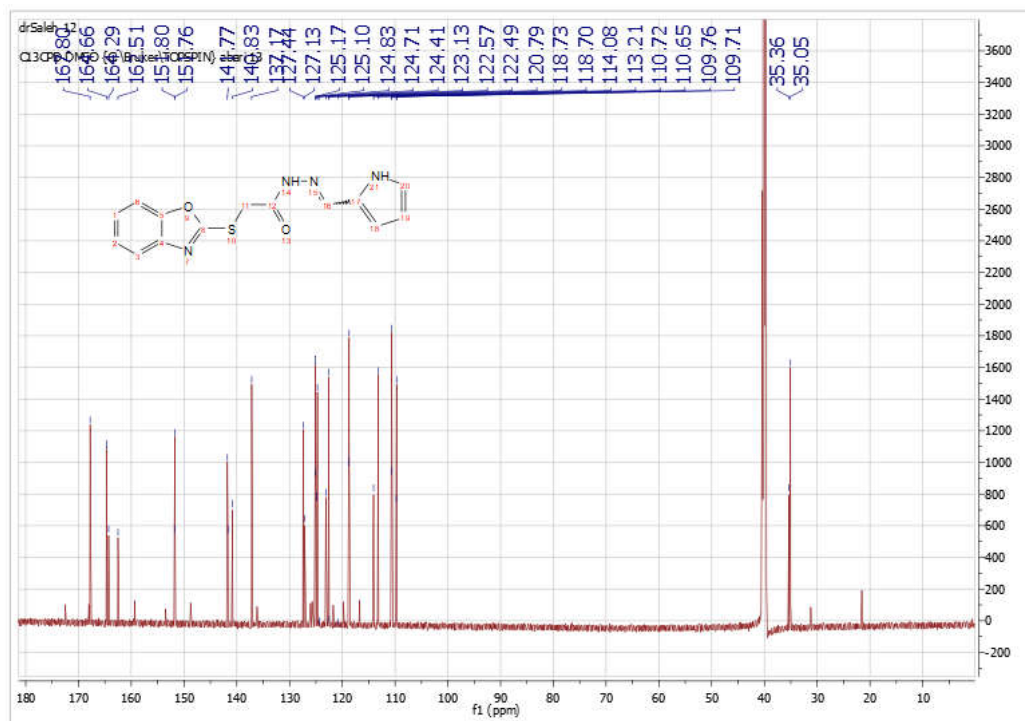

Figure S27: <sup>13</sup>CNMR of compound 6b

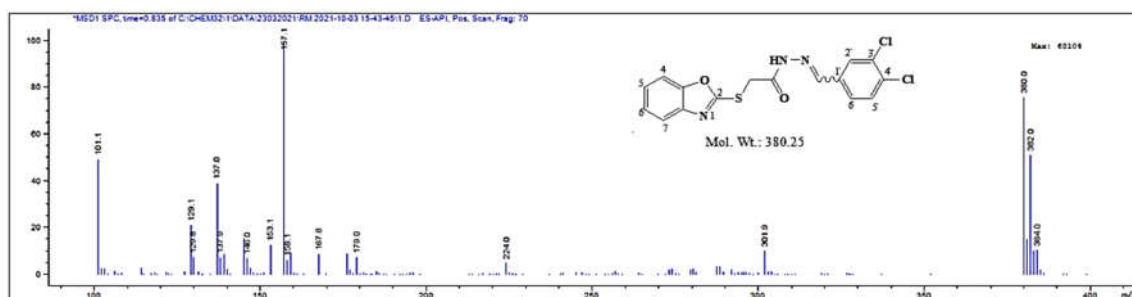

Figure S28: Mass of compound 4a

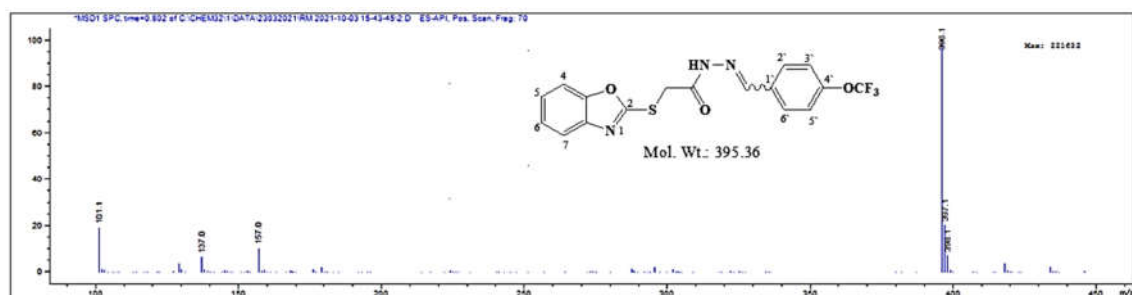

Figure S29: Mass of compound 4b

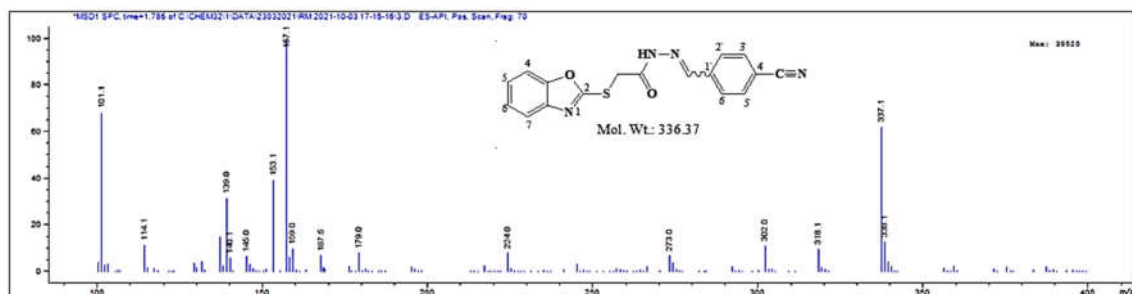

Figure S30: Mass of compound 4c

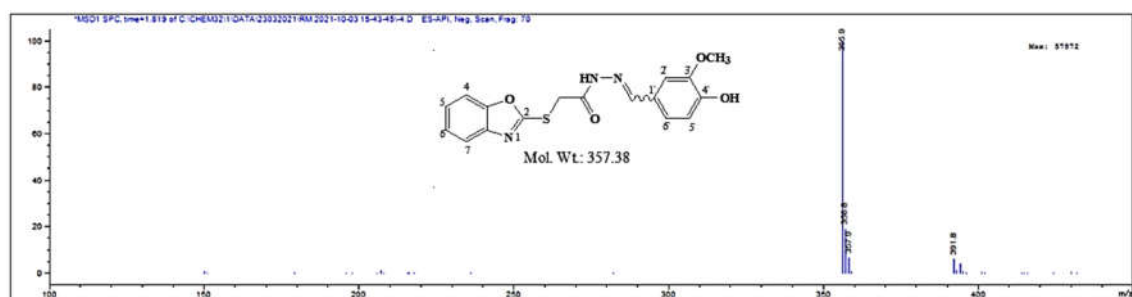

Figure S31: Mass of compound 4d

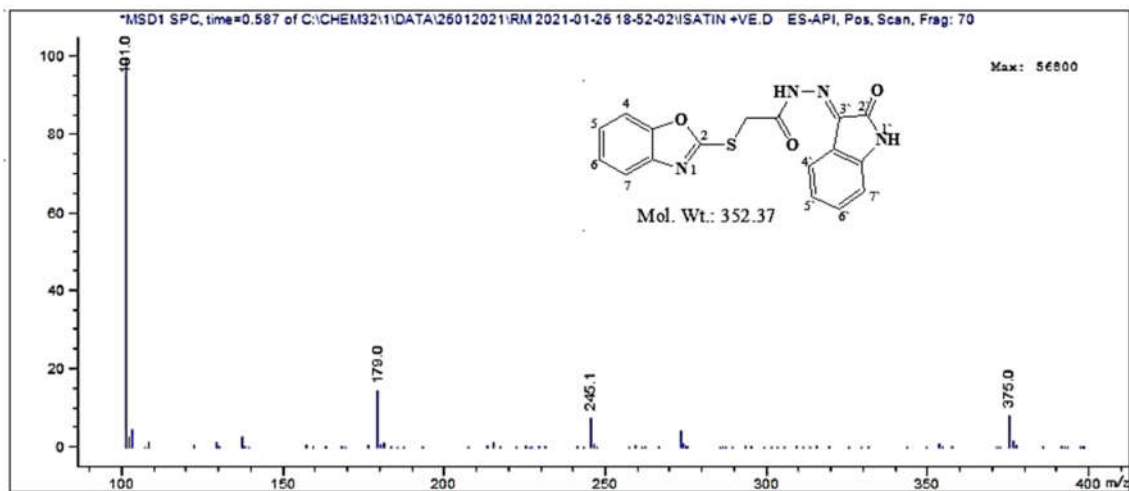

Figure S32: Mass of compound 5a

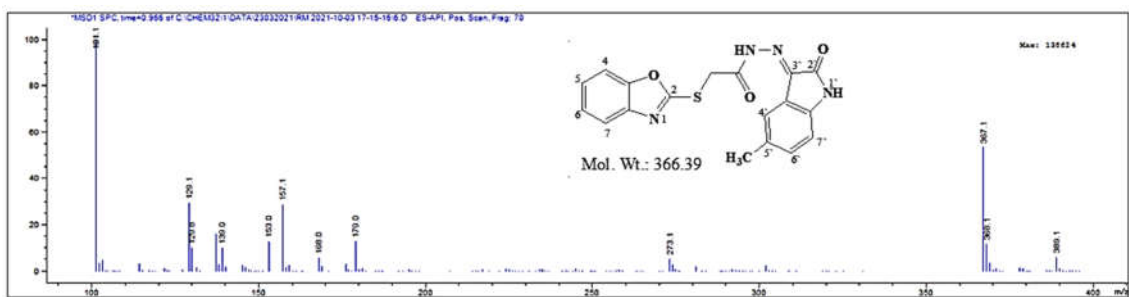

Figure S33: Mass of compound 5b

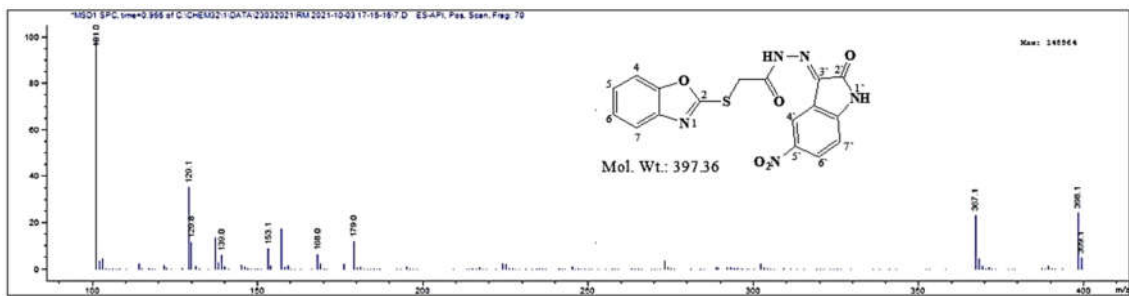

Figure S34: Mass of compound 5c

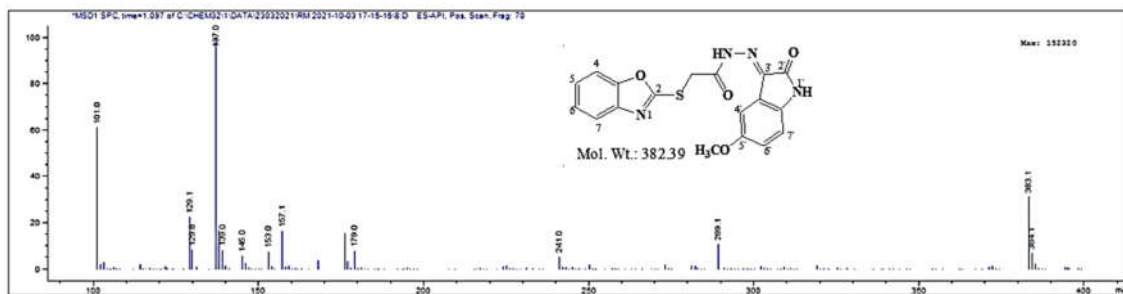

Figure S35: Mass of compound 5d

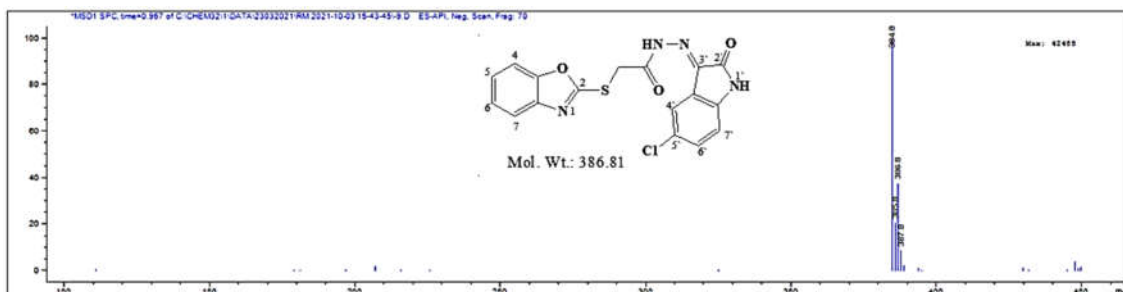

Figure S36: Mass of compound 5e

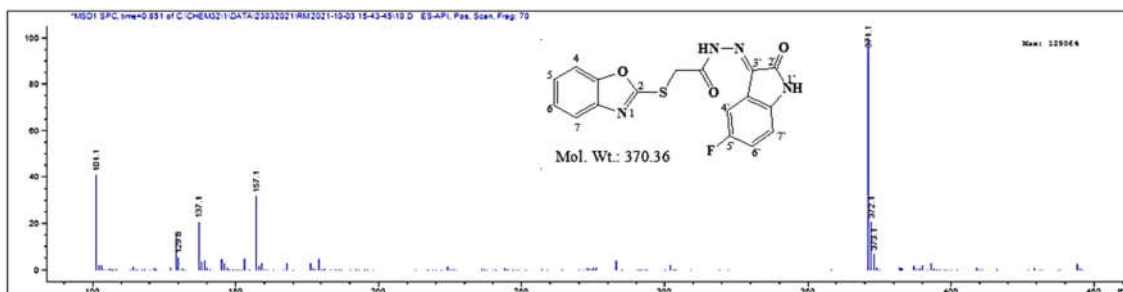

Figure S37: Mass of compound 5f

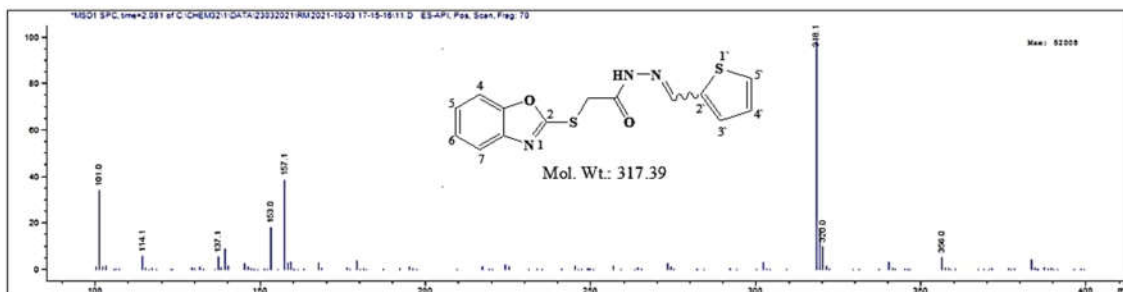

Figure S38: Mass of compound 6a

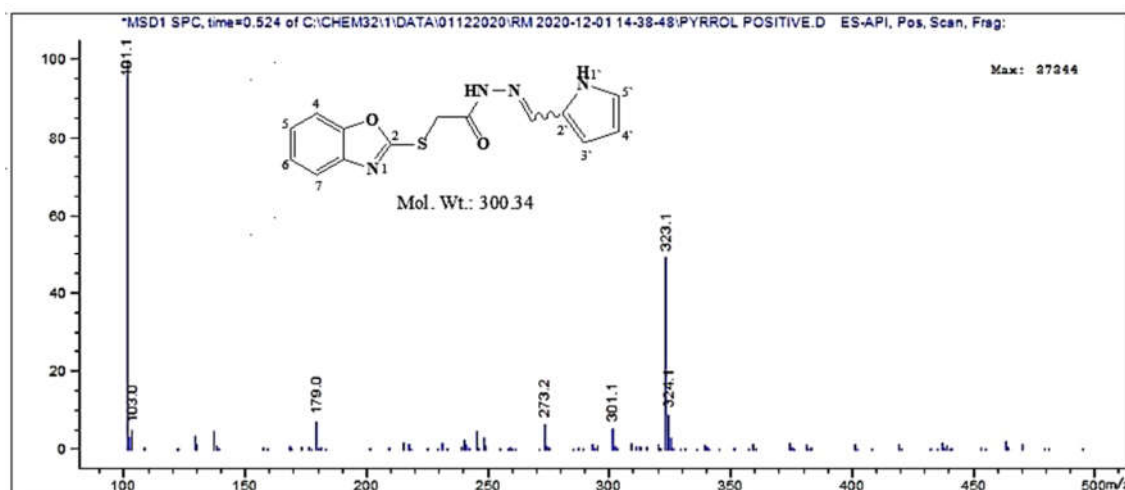

Figure S39: Mass of compound 6b
